# Supplementary material
Source: PubMed Central journal article supplement (PMC3192958)
Supplement: mmc1.pdf [file mmc1.pdf]

Cationic state distribution over the P700 chlorophyll pair in  
Photosystem I

Keisuke Saito and Hiroshi Ishikita

**Table S1.** Atomic charges of Table 1 (**ESP: unrestricted DFT**).

|    | atom | wild type | wild type,<br>vacuum | wild type,<br>$\Delta(\text{Arg-A750}$<br>$/\text{Ser-B734})$ | wild type,<br>$\Delta(\text{Arg-A750}$<br>$/\text{Ser-B734})$ |
|----|------|-----------|----------------------|---------------------------------------------------------------|---------------------------------------------------------------|
| PA | MG   | 1.35547   | 1.09021              | 1.35482                                                       | 1.35768                                                       |
| PA | CHA  | 0.21113   | 0.16956              | 0.2106                                                        | 0.2125                                                        |
| PA | CHB  | -0.4912   | -0.45658             | -0.48988                                                      | -0.55482                                                      |
| PA | HHB  | 0.18743   | 0.17357              | 0.18537                                                       | 0.17808                                                       |
| PA | CHC  | -0.38634  | -0.30492             | -0.38582                                                      | -0.38307                                                      |
| PA | HHC  | 0.13862   | 0.12726              | 0.13726                                                       | 0.14347                                                       |
| PA | CHD  | -0.5302   | -0.46312             | -0.53629                                                      | -0.52875                                                      |
| PA | HHD  | 0.22576   | 0.20466              | 0.23061                                                       | 0.22635                                                       |
| PA | NA   | -0.34823  | -0.29126             | -0.34261                                                      | -0.33797                                                      |
| PA | C1A  | -0.23261  | -0.20778             | -0.23414                                                      | -0.23464                                                      |
| PA | C2A  | 0.40008   | 0.38518              | 0.40054                                                       | 0.37957                                                       |
| PA | H2A  | -0.02631  | -0.01067             | -0.02639                                                      | -0.01838                                                      |
| PA | C3A  | 0.06662   | -0.01607             | 0.06941                                                       | 0.07146                                                       |
| PA | H3A  | 0.03986   | 0.07684              | 0.03779                                                       | 0.03993                                                       |
| PA | C4A  | 0.32392   | 0.27399              | 0.31598                                                       | 0.31968                                                       |
| PA | CMA  | -0.42324  | -0.38014             | -0.42321                                                      | -0.40562                                                      |
| PA | HMA1 | 0.09253   | 0.11194              | 0.09033                                                       | 0.09498                                                       |
| PA | HMA2 | 0.13027   | 0.10078              | 0.13143                                                       | 0.12669                                                       |
| PA | HMA3 | 0.1156    | 0.11385              | 0.11389                                                       | 0.09918                                                       |
| PA | CAA  | 0.01556   | -0.02184             | 0.0143                                                        | 0.01481                                                       |
| PA | HAA1 | 0.02446   | 0.00482              | 0.02405                                                       | 0.02252                                                       |
| PA | HAA2 | -0.007    | 0.01508              | -0.00798                                                      | 0.00098                                                       |
| PA | CBA  | -0.61199  | -0.474               | -0.60973                                                      | -0.6242                                                       |
| PA | HBA1 | 0.15418   | 0.14755              | 0.15306                                                       | 0.15756                                                       |
| PA | HBA2 | 0.16968   | 0.09921              | 0.16799                                                       | 0.17431                                                       |
| PA | CGA  | 0.8715    | 0.75781              | 0.87158                                                       | 0.86772                                                       |
| PA | O1A  | -0.6504   | -0.51537             | -0.65383                                                      | -0.63724                                                      |
| PA | O2A  | -0.30004  | -0.28595             | -0.2964                                                       | -0.29961                                                      |
| PA | NB   | -0.63623  | -0.54695             | -0.63211                                                      | -0.64985                                                      |
| PA | C1B  | 0.26444   | 0.21938              | 0.258                                                         | 0.27296                                                       |
| PA | C2B  | 0.23133   | 0.20358              | 0.23263                                                       | 0.1956                                                        |

|    |      |          |          |          |          |
|----|------|----------|----------|----------|----------|
| PA | C3B  | -0.29061 | -0.21883 | -0.29347 | -0.28427 |
| PA | C4B  | 0.38241  | 0.31378  | 0.37953  | 0.39121  |
| PA | CMB  | -0.29415 | -0.33308 | -0.29176 | -0.31864 |
| PA | HMB1 | 0.07044  | 0.09427  | 0.06847  | 0.06699  |
| PA | HMB2 | 0.09042  | 0.10223  | 0.08745  | 0.08984  |
| PA | HMB3 | 0.06796  | 0.10347  | 0.06786  | 0.1089   |
| PA | CAB  | 0.08415  | 0.05926  | 0.08762  | 0.10637  |
| PA | HAB  | 0.09981  | 0.10634  | 0.10208  | 0.0904   |
| PA | CBB  | -0.46526 | -0.44888 | -0.47154 | -0.46195 |
| PA | HBB1 | 0.16713  | 0.17735  | 0.16625  | 0.17159  |
| PA | HBB2 | 0.20099  | 0.20174  | 0.19996  | 0.19687  |
| PA | NC   | -0.73739 | -0.6306  | -0.74079 | -0.74584 |
| PA | C1C  | 0.33777  | 0.24419  | 0.3378   | 0.34287  |
| PA | C2C  | 0.18199  | 0.20962  | 0.18326  | 0.17345  |
| PA | C3C  | -0.35219 | -0.3386  | -0.35554 | -0.34222 |
| PA | C4C  | 0.53417  | 0.45936  | 0.54383  | 0.5356   |
| PA | CMC  | -0.45799 | -0.46301 | -0.45861 | -0.45205 |
| PA | HMC1 | 0.13815  | 0.1409   | 0.1385   | 0.12942  |
| PA | HMC2 | 0.10918  | 0.11828  | 0.10706  | 0.11177  |
| PA | HMC3 | 0.17068  | 0.15583  | 0.17204  | 0.17263  |
| PA | CAC  | 0.24828  | 0.23831  | 0.24678  | 0.24004  |
| PA | HAC1 | -0.01493 | -0.01425 | -0.00873 | -0.01229 |
| PA | HAC2 | -0.01128 | -0.00818 | -0.01113 | -0.00899 |
| PA | CBC  | -0.37632 | -0.36896 | -0.37692 | -0.37214 |
| PA | HBC1 | 0.07888  | 0.09418  | 0.08062  | 0.07723  |
| PA | HBC2 | 0.12195  | 0.10137  | 0.12917  | 0.12301  |
| PA | HBC3 | 0.12114  | 0.10762  | 0.11784  | 0.12142  |
| PA | ND   | -0.59097 | -0.53298 | -0.60291 | -0.60346 |
| PA | C1D  | 0.33288  | 0.29241  | 0.35494  | 0.34335  |
| PA | C2D  | 0.13526  | 0.17849  | 0.12176  | 0.13117  |
| PA | C3D  | -0.31583 | -0.30429 | -0.30219 | -0.31118 |
| PA | C4D  | 0.15275  | 0.1541   | 0.15591  | 0.15467  |
| PA | CMD  | -0.39934 | -0.38982 | -0.39856 | -0.3998  |
| PA | HMD1 | 0.1243   | 0.11352  | 0.13155  | 0.12593  |
| PA | HMD2 | 0.12394  | 0.12861  | 0.13183  | 0.12533  |
| PA | HMD3 | 0.16348  | 0.14615  | 0.17051  | 0.16508  |

|    |      |          |          |          |          |
|----|------|----------|----------|----------|----------|
| PA | CAD  | 0.74048  | 0.68283  | 0.73423  | 0.73735  |
| PA | OBD  | -0.55761 | -0.45313 | -0.54772 | -0.55323 |
| PA | CBD  | -0.77744 | -0.63113 | -0.77961 | -0.77554 |
| PA | HBD1 | 0.20724  | 0.18903  | 0.20698  | 0.20794  |
| PA | CGD  | 0.82827  | 0.78205  | 0.83203  | 0.82964  |
| PA | O1D  | -0.51448 | -0.49835 | -0.51318 | -0.51646 |
| PA | O2D  | -0.36949 | -0.36692 | -0.37077 | -0.37009 |
| PA | CED  | -0.07259 | 0.00234  | -0.07155 | -0.06827 |
| PA | HED1 | 0.0387   | 0.0475   | 0.03565  | 0.03493  |
| PA | HED2 | 0.10831  | 0.08183  | 0.11035  | 0.10841  |
| PA | HED3 | 0.14324  | 0.10212  | 0.1419   | 0.14442  |
| PA | C1   | -0.11083 | -0.13187 | -0.11135 | -0.11427 |
| PA | H1   | 0.08074  | 0.09896  | 0.0809   | 0.08477  |
| PA | H2   | 0.10882  | 0.11789  | 0.10676  | 0.11131  |
| PA | H3   | 0.1193   | 0.10102  | 0.11968  | 0.11529  |
| PA |      |          |          |          |          |
| PB | MG   | 1.35866  | 1.11472  | 1.35473  | 1.37558  |
| PB | CHA  | -0.02181 | 0.02752  | -0.01974 | -0.02785 |
| PB | CHB  | -0.49255 | -0.44837 | -0.49201 | -0.5397  |
| PB | HHB  | 0.18925  | 0.17641  | 0.18756  | 0.17141  |
| PB | CHC  | -0.40195 | -0.32275 | -0.40055 | -0.39099 |
| PB | HHC  | 0.14719  | 0.14175  | 0.14803  | 0.14698  |
| PB | CHD  | -0.53921 | -0.43941 | -0.53693 | -0.54109 |
| PB | HHD  | 0.22894  | 0.1945   | 0.22965  | 0.22983  |
| PB | NA   | -0.31861 | -0.25813 | -0.31215 | -0.32827 |
| PB | C1A  | -0.10361 | -0.1788  | -0.11175 | -0.08775 |
| PB | C2A  | 0.30105  | 0.40939  | 0.30035  | 0.27306  |
| PB | H2A  | -0.01597 | -0.02268 | -0.01772 | -0.00791 |
| PB | C3A  | 0.10639  | 0.0244   | 0.11027  | 0.12431  |
| PB | H3A  | 0.04012  | 0.05716  | 0.03703  | 0.03555  |
| PB | C4A  | 0.30307  | 0.23987  | 0.29528  | 0.31171  |
| PB | CMA  | -0.42634 | -0.39464 | -0.42582 | -0.41712 |
| PB | HMA1 | 0.11065  | 0.12054  | 0.10698  | 0.11423  |
| PB | HMA2 | 0.1256   | 0.1063   | 0.1257   | 0.12533  |
| PB | HMA3 | 0.10766  | 0.11363  | 0.10657  | 0.09636  |
| PB | CAA  | 0.25084  | 0.09757  | 0.26433  | 0.25311  |

|    |      |          |          |          |          |
|----|------|----------|----------|----------|----------|
| PB | HAA1 | -0.07564 | -0.02431 | -0.07775 | -0.08215 |
| PB | HAA2 | -0.0517  | -0.02427 | -0.05471 | -0.04817 |
| PB | CBA  | -0.61896 | -0.5508  | -0.6278  | -0.62809 |
| PB | HBA1 | 0.17046  | 0.16367  | 0.16965  | 0.17569  |
| PB | HBA2 | 0.13314  | 0.11206  | 0.13441  | 0.13458  |
| PB | CGA  | 0.80025  | 0.76041  | 0.80334  | 0.79446  |
| PB | O1A  | -0.57357 | -0.50622 | -0.57624 | -0.55913 |
| PB | O2A  | -0.28142 | -0.29511 | -0.28028 | -0.28185 |
| PB | NB   | -0.66515 | -0.59837 | -0.66288 | -0.67666 |
| PB | C1B  | 0.31505  | 0.26301  | 0.31145  | 0.32722  |
| PB | C2B  | 0.15895  | 0.16097  | 0.15933  | 0.14801  |
| PB | C3B  | -0.22163 | -0.17209 | -0.22394 | -0.21831 |
| PB | C4B  | 0.42619  | 0.37045  | 0.42547  | 0.43796  |
| PB | CMB  | -0.28036 | -0.34225 | -0.27832 | -0.33363 |
| PB | HMB1 | 0.07194  | 0.09032  | 0.06981  | 0.08402  |
| PB | HMB2 | 0.08774  | 0.10913  | 0.08501  | 0.08971  |
| PB | HMB3 | 0.06194  | 0.11917  | 0.06252  | 0.11193  |
| PB | CAB  | -0.02416 | -0.04771 | -0.02187 | 0.00578  |
| PB | HAB  | 0.11718  | 0.12542  | 0.11789  | 0.11555  |
| PB | CBB  | -0.36025 | -0.3375  | -0.35943 | -0.39181 |
| PB | HBB1 | 0.16864  | 0.16591  | 0.16826  | 0.1747   |
| PB | HBB2 | 0.16938  | 0.16523  | 0.16755  | 0.16382  |
| PB | NC   | -0.69835 | -0.60299 | -0.69961 | -0.71235 |
| PB | C1C  | 0.30069  | 0.22714  | 0.3043   | 0.32092  |
| PB | C2C  | 0.22874  | 0.23621  | 0.224    | 0.21339  |
| PB | C3C  | -0.37195 | -0.34215 | -0.37076 | -0.35604 |
| PB | C4C  | 0.53908  | 0.44209  | 0.53975  | 0.54974  |
| PB | CMC  | -0.44126 | -0.43601 | -0.43833 | -0.43253 |
| PB | HMC1 | 0.11997  | 0.12812  | 0.11916  | 0.11388  |
| PB | HMC2 | 0.11263  | 0.12353  | 0.11474  | 0.11593  |
| PB | HMC3 | 0.16729  | 0.14988  | 0.17042  | 0.16577  |
| PB | CAC  | 0.32461  | 0.28206  | 0.32481  | 0.31209  |
| PB | HAC1 | -0.00683 | -0.02341 | -0.00778 | -0.00252 |
| PB | HAC2 | -0.03653 | -0.02016 | -0.03291 | -0.0325  |
| PB | CBC  | -0.39601 | -0.37445 | -0.39496 | -0.39458 |
| PB | HBC1 | 0.07943  | 0.08944  | 0.07611  | 0.0794   |

|                         |      |          |          |          |          |
|-------------------------|------|----------|----------|----------|----------|
| PB                      | HBC2 | 0.15753  | 0.1036   | 0.15906  | 0.1593   |
| PB                      | HBC3 | 0.10222  | 0.11008  | 0.10337  | 0.10419  |
| PB                      | ND   | -0.75183 | -0.63327 | -0.74694 | -0.77008 |
| PB                      | C1D  | 0.45936  | 0.34739  | 0.45556  | 0.47532  |
| PB                      | C2D  | 0.03884  | 0.09827  | 0.03904  | 0.03821  |
| PB                      | C3D  | -0.22171 | -0.24006 | -0.22117 | -0.22156 |
| PB                      | C4D  | 0.34493  | 0.28779  | 0.33715  | 0.36141  |
| PB                      | CMD  | -0.34924 | -0.35693 | -0.35085 | -0.35105 |
| PB                      | HMD1 | 0.13113  | 0.11269  | 0.13167  | 0.1336   |
| PB                      | HMD2 | 0.12901  | 0.12589  | 0.13041  | 0.13095  |
| PB                      | HMD3 | 0.17045  | 0.14205  | 0.1695   | 0.17285  |
| PB                      | CAD  | 0.62967  | 0.64475  | 0.62997  | 0.6288   |
| PB                      | OBD  | -0.42398 | -0.43502 | -0.4288  | -0.41819 |
| PB                      | CBD  | -0.6503  | -0.62986 | -0.65144 | -0.6478  |
| PB                      | HBD1 | 0.19526  | 0.1877   | 0.1946   | 0.19576  |
| PB                      | CGD  | 0.79514  | 0.79877  | 0.79634  | 0.794    |
| PB                      | O1D  | -0.49682 | -0.48653 | -0.49843 | -0.49577 |
| PB                      | O2D  | -0.35469 | -0.34845 | -0.35533 | -0.35396 |
| PB                      | CED  | -0.06832 | -0.05297 | -0.06662 | -0.06732 |
| PB                      | HED1 | 0.11586  | 0.1096   | 0.11353  | 0.11719  |
| PB                      | HED2 | 0.08628  | 0.07382  | 0.0847   | 0.08633  |
| PB                      | HED3 | 0.09891  | 0.09368  | 0.09709  | 0.10023  |
| PB                      | C1   | -0.14602 | -0.14698 | -0.1455  | -0.15119 |
| PB                      | H1   | 0.1385   | 0.11777  | 0.13686  | 0.14241  |
| PB                      | H2   | 0.09874  | 0.11437  | 0.09661  | 0.10359  |
| PB                      | H3   | 0.09296  | 0.10172  | 0.09338  | 0.09138  |
| <hr/> <b>total (PA)</b> |      | 0.27916  | 0.41469  | 0.30602  | 0.24039  |
| <hr/> <b>total (PB)</b> |      | 0.72078  | 0.58527  | 0.69398  | 0.75961  |
| <hr/>                   |      |          |          |          |          |

|    | atom | T743V    | T743V with<br>$\Delta(\text{Arg-A750}/\text{Ser-B734})$ | [rotated<br>methyl-ester]<br>A <sub>-1A</sub> | [rotated<br>methyl-ester]<br>A <sub>-1B</sub> | [rotated<br>methyl-ester]<br>A <sub>-1A</sub> /A <sub>-1B</sub> |
|----|------|----------|---------------------------------------------------------|-----------------------------------------------|-----------------------------------------------|-----------------------------------------------------------------|
| PA | MG   | 1.36812  | 1.36709                                                 | 1.33677                                       | 1.3854                                        | 1.36944                                                         |
| PA | CHA  | 0.12917  | 0.1287                                                  | 0.21165                                       | 0.22768                                       | 0.22328                                                         |
| PA | CHB  | -0.51249 | -0.51061                                                | -0.51854                                      | -0.52439                                      | -0.55317                                                        |
| PA | HHB  | 0.18858  | 0.18666                                                 | 0.19219                                       | 0.19063                                       | 0.19535                                                         |
| PA | CHC  | -0.39299 | -0.39329                                                | -0.4094                                       | -0.39813                                      | -0.42228                                                        |
| PA | HHC  | 0.139    | 0.138                                                   | 0.1508                                        | 0.14254                                       | 0.15611                                                         |
| PA | CHD  | -0.5146  | -0.52118                                                | -0.52195                                      | -0.53324                                      | -0.52928                                                        |
| PA | HHD  | 0.21859  | 0.2235                                                  | 0.22481                                       | 0.22513                                       | 0.2253                                                          |
| PA | NA   | -0.39055 | -0.38357                                                | -0.34214                                      | -0.40542                                      | -0.40155                                                        |
| PA | C1A  | -0.15846 | -0.16044                                                | -0.23803                                      | -0.21759                                      | -0.22133                                                        |
| PA | C2A  | 0.31003  | 0.30984                                                 | 0.38929                                       | 0.36245                                       | 0.36822                                                         |
| PA | H2A  | -0.01545 | -0.01527                                                | -0.0243                                       | -0.02003                                      | -0.02163                                                        |
| PA | C3A  | 0.1209   | 0.12402                                                 | 0.07651                                       | 0.0846                                        | 0.08661                                                         |
| PA | H3A  | 0.0193   | 0.01743                                                 | 0.03744                                       | 0.03104                                       | 0.03119                                                         |
| PA | C4A  | 0.34628  | 0.33756                                                 | 0.3278                                        | 0.36622                                       | 0.37498                                                         |
| PA | CMA  | -0.43286 | -0.43297                                                | -0.42473                                      | -0.42722                                      | -0.42871                                                        |
| PA | HMA1 | 0.09449  | 0.09252                                                 | 0.09298                                       | 0.09259                                       | 0.09361                                                         |
| PA | HMA2 | 0.13255  | 0.13374                                                 | 0.12771                                       | 0.13166                                       | 0.12849                                                         |
| PA | HMA3 | 0.11428  | 0.11267                                                 | 0.11363                                       | 0.11461                                       | 0.11286                                                         |
| PA | CAA  | 0.08311  | 0.08222                                                 | 0.02806                                       | 0.03891                                       | 0.02829                                                         |
| PA | HAA1 | 0.02525  | 0.02516                                                 | 0.02291                                       | 0.03525                                       | 0.03507                                                         |
| PA | HAA2 | -0.03311 | -0.0342                                                 | -0.00942                                      | -0.00623                                      | -0.00217                                                        |
| PA | CBA  | -0.62234 | -0.62023                                                | -0.61675                                      | -0.65088                                      | -0.64822                                                        |
| PA | HBA1 | 0.13977  | 0.13871                                                 | 0.1541                                        | 0.1644                                        | 0.16455                                                         |
| PA | HBA2 | 0.18113  | 0.17953                                                 | 0.1705                                        | 0.18238                                       | 0.18151                                                         |
| PA | CGA  | 0.85235  | 0.85228                                                 | 0.87059                                       | 0.87395                                       | 0.87457                                                         |
| PA | O1A  | -0.63925 | -0.64257                                                | -0.64938                                      | -0.64625                                      | -0.64676                                                        |
| PA | O2A  | -0.30834 | -0.30479                                                | -0.3023                                       | -0.30603                                      | -0.30739                                                        |
| PA | NB   | -0.65943 | -0.65568                                                | -0.65742                                      | -0.66536                                      | -0.68907                                                        |
| PA | C1B  | 0.28235  | 0.27629                                                 | 0.2857                                        | 0.29883                                       | 0.31912                                                         |
| PA | C2B  | 0.23701  | 0.23805                                                 | 0.23361                                       | 0.2212                                        | 0.22694                                                         |

|    |      |          |          |          |          |          |
|----|------|----------|----------|----------|----------|----------|
| PA | C3B  | -0.31242 | -0.31508 | -0.31415 | -0.29235 | -0.3212  |
| PA | C4B  | 0.40341  | 0.40175  | 0.41881  | 0.39027  | 0.4292   |
| PA | CMB  | -0.29393 | -0.29195 | -0.29382 | -0.30011 | -0.29499 |
| PA | HMB1 | 0.07033  | 0.06846  | 0.06764  | 0.07239  | 0.06855  |
| PA | HMB2 | 0.08763  | 0.08486  | 0.09278  | 0.09337  | 0.09305  |
| PA | HMB3 | 0.06888  | 0.06928  | 0.06768  | 0.06419  | 0.06321  |
| PA | CAB  | 0.094    | 0.09743  | 0.09913  | 0.09195  | 0.11455  |
| PA | HAB  | 0.10003  | 0.1024   | 0.08505  | 0.09525  | 0.0774   |
| PA | CBB  | -0.46631 | -0.47227 | -0.41861 | -0.46732 | -0.42515 |
| PA | HBB1 | 0.16512  | 0.16444  | 0.15169  | 0.16664  | 0.15243  |
| PA | HBB2 | 0.203    | 0.20192  | 0.2042   | 0.20083  | 0.20454  |
| PA | NC   | -0.73486 | -0.73815 | -0.73858 | -0.76269 | -0.76085 |
| PA | C1C  | 0.33962  | 0.34038  | 0.34746  | 0.35685  | 0.3624   |
| PA | C2C  | 0.18497  | 0.18621  | 0.16571  | 0.16131  | 0.14861  |
| PA | C3C  | -0.34863 | -0.35152 | -0.34573 | -0.3429  | -0.34022 |
| PA | C4C  | 0.52476  | 0.53475  | 0.523    | 0.54343  | 0.53541  |
| PA | CMC  | -0.46995 | -0.47085 | -0.44108 | -0.43744 | -0.42236 |
| PA | HMC1 | 0.14131  | 0.14208  | 0.13437  | 0.12745  | 0.12569  |
| PA | HMC2 | 0.11022  | 0.10824  | 0.10694  | 0.10546  | 0.10299  |
| PA | HMC3 | 0.17639  | 0.17784  | 0.16547  | 0.1667   | 0.16161  |
| PA | CAC  | 0.26396  | 0.26154  | 0.24826  | 0.24028  | 0.24187  |
| PA | HAC1 | -0.02074 | -0.01453 | -0.01566 | -0.01274 | -0.01389 |
| PA | HAC2 | -0.01496 | -0.01444 | -0.01101 | -0.00995 | -0.00968 |
| PA | CBC  | -0.37424 | -0.37451 | -0.3767  | -0.37135 | -0.37281 |
| PA | HBC1 | 0.07691  | 0.07861  | 0.07807  | 0.07723  | 0.07662  |
| PA | HBC2 | 0.11938  | 0.12667  | 0.12196  | 0.12059  | 0.12086  |
| PA | HBC3 | 0.12056  | 0.11743  | 0.1207   | 0.12014  | 0.12013  |
| PA | ND   | -0.61305 | -0.62576 | -0.57814 | -0.61093 | -0.60574 |
| PA | C1D  | 0.33635  | 0.36033  | 0.32173  | 0.33932  | 0.33286  |
| PA | C2D  | 0.12759  | 0.11301  | 0.13366  | 0.13338  | 0.13026  |
| PA | C3D  | -0.31204 | -0.29807 | -0.31313 | -0.32461 | -0.32354 |
| PA | C4D  | 0.20338  | 0.20701  | 0.14394  | 0.16239  | 0.16177  |
| PA | CMD  | -0.39068 | -0.38936 | -0.39843 | -0.39625 | -0.39415 |
| PA | HMD1 | 0.12493  | 0.13237  | 0.12372  | 0.12208  | 0.12132  |
| PA | HMD2 | 0.12267  | 0.13046  | 0.12244  | 0.12313  | 0.1212   |
| PA | HMD3 | 0.15967  | 0.16663  | 0.16305  | 0.16207  | 0.16174  |



|    |      |          |          |          |          |          |
|----|------|----------|----------|----------|----------|----------|
| PA | CAD  | 0.69165  | 0.68425  | 0.73665  | 0.74368  | 0.73954  |
| PA | OBD  | -0.49495 | -0.48393 | -0.55897 | -0.56079 | -0.56194 |
| PA | CBD  | -0.67949 | -0.68108 | -0.77303 | -0.79784 | -0.7948  |
| PA | HBD1 | 0.191    | 0.19085  | 0.20554  | 0.21062  | 0.20951  |
| PA | CGD  | 0.79524  | 0.79901  | 0.82857  | 0.83903  | 0.84219  |
| PA | O1D  | -0.511   | -0.50943 | -0.51437 | -0.52097 | -0.52127 |
| PA | O2D  | -0.35805 | -0.3593  | -0.37079 | -0.37057 | -0.37189 |
| PA | CED  | -0.03092 | -0.02991 | -0.0694  | -0.06799 | -0.06918 |
| PA | HED1 | 0.03781  | 0.03498  | 0.03828  | 0.03474  | 0.03512  |
| PA | HED2 | 0.10162  | 0.10372  | 0.10752  | 0.10613  | 0.10655  |
| PA | HED3 | 0.09876  | 0.09724  | 0.14196  | 0.14385  | 0.14349  |
| PA | C1   | -0.09263 | -0.09287 | -0.10572 | -0.1066  | -0.10511 |
| PA | H1   | 0.07445  | 0.0747   | 0.08032  | 0.08162  | 0.0816   |
| PA | H2   | 0.10065  | 0.09853  | 0.10524  | 0.10709  | 0.10659  |
| PA | H3   | 0.12227  | 0.12251  | 0.11926  | 0.11584  | 0.11558  |
| PA |      |          |          |          |          |          |
| PB | MG   | 1.36144  | 1.35711  | 1.38975  | 1.39831  | 1.42671  |
| PB | CHA  | -0.02528 | -0.02279 | -0.03689 | -0.04485 | -0.06521 |
| PB | CHB  | -0.51383 | -0.51287 | -0.5428  | -0.49772 | -0.55591 |
| PB | HHB  | 0.18956  | 0.18761  | 0.19271  | 0.18571  | 0.19029  |
| PB | CHC  | -0.41738 | -0.41571 | -0.43831 | -0.38043 | -0.41011 |
| PB | HHC  | 0.15574  | 0.15645  | 0.15294  | 0.14158  | 0.14562  |
| PB | CHD  | -0.52781 | -0.52499 | -0.55196 | -0.5512  | -0.56675 |
| PB | HHD  | 0.22584  | 0.22645  | 0.23095  | 0.23007  | 0.23279  |
| PB | NA   | -0.34527 | -0.33842 | -0.41224 | -0.38333 | -0.47912 |
| PB | C1A  | -0.08612 | -0.09498 | -0.03882 | -0.058   | 0.0104   |
| PB | C2A  | 0.27724  | 0.27636  | 0.25068  | 0.28876  | 0.23222  |
| PB | H2A  | -0.01357 | -0.01536 | -0.01321 | -0.01762 | -0.01261 |
| PB | C3A  | 0.11686  | 0.12133  | 0.13326  | 0.10927  | 0.12895  |
| PB | H3A  | 0.03497  | 0.03152  | 0.02766  | 0.03668  | 0.02606  |
| PB | C4A  | 0.32948  | 0.32086  | 0.37724  | 0.34471  | 0.43315  |
| PB | CMA  | -0.43158 | -0.43103 | -0.4328  | -0.43295 | -0.44061 |
| PB | HMA1 | 0.11135  | 0.1075   | 0.11257  | 0.11154  | 0.11471  |
| PB | HMA2 | 0.12635  | 0.1265   | 0.12577  | 0.1282   | 0.12833  |
| PB | HMA3 | 0.1071   | 0.10593  | 0.10622  | 0.10979  | 0.10876  |
| PB | CAA  | 0.26842  | 0.28168  | 0.30457  | 0.2693   | 0.32379  |

|    |      |          |          |          |          |          |
|----|------|----------|----------|----------|----------|----------|
| PB | HAA1 | -0.07752 | -0.0796  | -0.09685 | -0.07901 | -0.10209 |
| PB | HAA2 | -0.05496 | -0.05788 | -0.06504 | -0.0566  | -0.06922 |
| PB | CBA  | -0.62838 | -0.63723 | -0.63073 | -0.62463 | -0.63476 |
| PB | HBA1 | 0.17223  | 0.17146  | 0.17051  | 0.17118  | 0.17079  |
| PB | HBA2 | 0.13535  | 0.13662  | 0.13497  | 0.13441  | 0.1361   |
| PB | CGA  | 0.80046  | 0.80357  | 0.80317  | 0.80027  | 0.80255  |
| PB | O1A  | -0.57349 | -0.57623 | -0.57524 | -0.57353 | -0.57532 |
| PB | O2A  | -0.28153 | -0.28044 | -0.28221 | -0.28246 | -0.28204 |
| PB | NB   | -0.67143 | -0.66823 | -0.71519 | -0.66444 | -0.71683 |
| PB | C1B  | 0.32245  | 0.31769  | 0.36961  | 0.32817  | 0.38297  |
| PB | C2B  | 0.17307  | 0.17317  | 0.14842  | 0.16882  | 0.16319  |
| PB | C3B  | -0.24946 | -0.25183 | -0.24174 | -0.19587 | -0.22248 |
| PB | C4B  | 0.43849  | 0.43697  | 0.47388  | 0.42206  | 0.47445  |
| PB | CMB  | -0.29214 | -0.28928 | -0.27943 | -0.29643 | -0.2935  |
| PB | HMB1 | 0.07536  | 0.073    | 0.07316  | 0.07794  | 0.07799  |
| PB | HMB2 | 0.08967  | 0.08675  | 0.08807  | 0.0912   | 0.08975  |
| PB | HMB3 | 0.06043  | 0.06032  | 0.0628   | 0.05904  | 0.0608   |
| PB | CAB  | -0.00339 | -0.00101 | -0.01481 | -0.02292 | -0.01644 |
| PB | HAB  | 0.1084   | 0.10883  | 0.11593  | 0.12395  | 0.12339  |
| PB | CBB  | -0.36571 | -0.36515 | -0.3641  | -0.39466 | -0.39398 |
| PB | HBB1 | 0.16726  | 0.16675  | 0.1689   | 0.1661   | 0.16483  |
| PB | HBB2 | 0.16733  | 0.1655   | 0.17159  | 0.15697  | 0.15859  |
| PB | NC   | -0.69995 | -0.70078 | -0.72631 | -0.71778 | -0.73851 |
| PB | C1C  | 0.31066  | 0.31323  | 0.33887  | 0.3197   | 0.34242  |
| PB | C2C  | 0.2303   | 0.22668  | 0.21047  | 0.20812  | 0.20287  |
| PB | C3C  | -0.37796 | -0.37737 | -0.36842 | -0.35036 | -0.35598 |
| PB | C4C  | 0.53119  | 0.53099  | 0.55565  | 0.55236  | 0.57037  |
| PB | CMC  | -0.46634 | -0.46492 | -0.42961 | -0.42905 | -0.42021 |
| PB | HMC1 | 0.12519  | 0.12446  | 0.11663  | 0.1123   | 0.11004  |
| PB | HMC2 | 0.11692  | 0.11924  | 0.11092  | 0.11207  | 0.10998  |
| PB | HMC3 | 0.17973  | 0.18317  | 0.16496  | 0.16374  | 0.1619   |
| PB | CAC  | 0.33183  | 0.33277  | 0.32421  | 0.31097  | 0.31252  |
| PB | HAC1 | -0.00869 | -0.00996 | -0.00655 | -0.00338 | -0.00348 |
| PB | HAC2 | -0.04349 | -0.04044 | -0.03586 | -0.03318 | -0.03292 |
| PB | CBC  | -0.38645 | -0.38526 | -0.39772 | -0.39664 | -0.39871 |
| PB | HBC1 | 0.07627  | 0.07296  | 0.07971  | 0.08011  | 0.08098  |

|                   |      |          |          |          |          |          |
|-------------------|------|----------|----------|----------|----------|----------|
| PB                | HBC2 | 0.15435  | 0.1557   | 0.15805  | 0.15815  | 0.15876  |
| PB                | HBC3 | 0.10012  | 0.10123  | 0.10255  | 0.10308  | 0.10344  |
| PB                | ND   | -0.74808 | -0.7422  | -0.76449 | -0.78228 | -0.79686 |
| PB                | C1D  | 0.45254  | 0.44752  | 0.47531  | 0.48017  | 0.49821  |
| PB                | C2D  | 0.03499  | 0.03556  | 0.03543  | 0.03658  | 0.03179  |
| PB                | C3D  | -0.22085 | -0.22043 | -0.22365 | -0.22926 | -0.23145 |
| PB                | C4D  | 0.34203  | 0.33337  | 0.36128  | 0.37561  | 0.39586  |
| PB                | CMD  | -0.34411 | -0.34594 | -0.34614 | -0.34839 | -0.34424 |
| PB                | HMD1 | 0.12834  | 0.12868  | 0.13118  | 0.13101  | 0.13094  |
| PB                | HMD2 | 0.12764  | 0.12902  | 0.12757  | 0.12901  | 0.12724  |
| PB                | HMD3 | 0.16891  | 0.1679   | 0.17026  | 0.17082  | 0.17055  |
| PB                | CAD  | 0.62903  | 0.62935  | 0.63393  | 0.63408  | 0.63687  |
| PB                | OBD  | -0.42533 | -0.43052 | -0.42347 | -0.42427 | -0.42346 |
| PB                | CBD  | -0.6515  | -0.65253 | -0.6669  | -0.65366 | -0.66516 |
| PB                | HBD1 | 0.19583  | 0.19483  | 0.20826  | 0.19707  | 0.20829  |
| PB                | CGD  | 0.79564  | 0.797    | 0.80005  | 0.79575  | 0.79893  |
| PB                | O1D  | -0.4971  | -0.4988  | -0.49803 | -0.49637 | -0.49708 |
| PB                | O2D  | -0.35483 | -0.35553 | -0.35515 | -0.35467 | -0.35526 |
| PB                | CED  | -0.06953 | -0.06794 | -0.06831 | -0.07028 | -0.06975 |
| PB                | HED1 | 0.11584  | 0.11349  | 0.1157   | 0.11647  | 0.11629  |
| PB                | HED2 | 0.08613  | 0.08455  | 0.08578  | 0.08666  | 0.08599  |
| PB                | HED3 | 0.0987   | 0.09684  | 0.09965  | 0.09948  | 0.09997  |
| PB                | C1   | -0.14293 | -0.1424  | -0.14045 | -0.14444 | -0.14048 |
| PB                | H1   | 0.13779  | 0.13614  | 0.13666  | 0.13804  | 0.13673  |
| PB                | H2   | 0.0974   | 0.09526  | 0.09636  | 0.09831  | 0.09617  |
| PB                | H3   | 0.09175  | 0.09211  | 0.09249  | 0.09243  | 0.09267  |
| <b>total (PA)</b> |      | 0.32206  | 0.35605  | 0.26617  | 0.2346   | 0.2236   |
| <b>total (PB)</b> |      | 0.67798  | 0.64393  | 0.73383  | 0.76546  | 0.77643  |

|    | <b>atom</b> | <b>wild type,<br/>CH<sub>3</sub>COO-<br/>deleted</b> | <b>wild type,<br/>CH<sub>3</sub>COO-<br/>deleted,<br/>vacuum</b> | <b>T743V,<br/>CH<sub>3</sub>COO-<br/>deleted</b> | <b>T743V,<br/>CH<sub>3</sub>COO-<br/>deleted,<br/>Δ(Arg-A750<br/>/Ser-B734)</b> |
|----|-------------|------------------------------------------------------|------------------------------------------------------------------|--------------------------------------------------|---------------------------------------------------------------------------------|
| PA | MG          | 1.3556                                               | 1.09622                                                          | 1.3678                                           | 1.36713                                                                         |
| PA | CHA         | 0.25712                                              | 0.20974                                                          | 0.19641                                          | 0.19585                                                                         |
| PA | CHB         | -0.46792                                             | -0.43392                                                         | -0.49429                                         | -0.49266                                                                        |
| PA | HHB         | 0.18776                                              | 0.17379                                                          | 0.19065                                          | 0.18875                                                                         |
| PA | CHC         | -0.41692                                             | -0.33956                                                         | -0.42067                                         | -0.42241                                                                        |
| PA | HHC         | 0.1573                                               | 0.14652                                                          | 0.15684                                          | 0.15653                                                                         |
| PA | CHD         | -0.5058                                              | -0.43924                                                         | -0.49278                                         | -0.5004                                                                         |
| PA | HHD         | 0.22159                                              | 0.19961                                                          | 0.21482                                          | 0.21989                                                                         |
| PA | NA          | -0.27379                                             | -0.22223                                                         | -0.29767                                         | -0.29135                                                                        |
| PA | C1A         | -0.35138                                             | -0.32123                                                         | -0.31814                                         | -0.31919                                                                        |
| PA | C2A         | 0.49326                                              | 0.47599                                                          | 0.4704                                           | 0.46828                                                                         |
| PA | H2A         | -0.04942                                             | -0.02991                                                         | -0.04902                                         | -0.04854                                                                        |
| PA | C3A         | 0.05132                                              | -0.02506                                                         | 0.08934                                          | 0.09278                                                                         |
| PA | H3A         | 0.03955                                              | 0.0796                                                           | 0.02248                                          | 0.0205                                                                          |
| PA | C4A         | 0.27212                                              | 0.22511                                                          | 0.29175                                          | 0.28349                                                                         |
| PA | CMA         | -0.41306                                             | -0.3776                                                          | -0.42262                                         | -0.42273                                                                        |
| PA | HMA1        | 0.0882                                               | 0.11001                                                          | 0.08951                                          | 0.08759                                                                         |
| PA | HMA2        | 0.12881                                              | 0.10098                                                          | 0.13029                                          | 0.1315                                                                          |
| PA | HMA3        | 0.11662                                              | 0.11556                                                          | 0.11653                                          | 0.11491                                                                         |
| PA | CAA         | 0.06006                                              | -0.01599                                                         | 0.0525                                           | 0.05424                                                                         |
| PA | HAA1        | 0.00514                                              | 0.00396                                                          | 0.02095                                          | 0.02029                                                                         |
| PA | HAA2        | -0.00062                                             | 0.02925                                                          | 0.0006                                           | 0.00066                                                                         |
| PA | CBA         | -0.7129                                              | -0.56127                                                         | -0.71205                                         | -0.71217                                                                        |
| PA | HBA1        | 0.17229                                              | 0.16383                                                          | 0.15556                                          | 0.15471                                                                         |
| PA | HBA2        | 0.18892                                              | 0.11312                                                          | 0.20008                                          | 0.19908                                                                         |
| PA | CGA         | 0.9234                                               | 0.8131                                                           | 0.9062                                           | 0.90701                                                                         |
| PA | O1A         | -0.65689                                             | -0.52649                                                         | -0.64687                                         | -0.65014                                                                        |
| PA | O2A         | -0.32982                                             | -0.31982                                                         | -0.33322                                         | -0.3305                                                                         |
| PA | NB          | -0.64032                                             | -0.5627                                                          | -0.66921                                         | -0.66608                                                                        |

|    |      |          |          |          |          |
|----|------|----------|----------|----------|----------|
| PA | C1B  | 0.25149  | 0.21382  | 0.27987  | 0.2744   |
| PA | C2B  | 0.22435  | 0.19643  | 0.21868  | 0.21966  |
| PA | C3B  | -0.28333 | -0.21457 | -0.29664 | -0.2998  |
| PA | C4B  | 0.40308  | 0.34342  | 0.42347  | 0.42279  |
| PA | CMB  | -0.26635 | -0.31186 | -0.26133 | -0.25922 |
| PA | HMB1 | 0.06524  | 0.09053  | 0.06469  | 0.0628   |
| PA | HMB2 | 0.08008  | 0.09398  | 0.07688  | 0.07398  |
| PA | HMB3 | 0.05339  | 0.09239  | 0.05371  | 0.05411  |
| PA | CAB  | 0.08524  | 0.05264  | 0.09335  | 0.09758  |
| PA | HAB  | 0.08855  | 0.09816  | 0.08805  | 0.08963  |
| PA | CBB  | -0.4816  | -0.4508  | -0.48725 | -0.49365 |
| PA | HBB1 | 0.17646  | 0.17909  | 0.17711  | 0.17687  |
| PA | HBB2 | 0.20657  | 0.20437  | 0.20971  | 0.2087   |
| PA | NC   | -0.7388  | -0.6355  | -0.73857 | -0.74222 |
| PA | C1C  | 0.35666  | 0.26568  | 0.35863  | 0.3605   |
| PA | C2C  | 0.17486  | 0.20406  | 0.17456  | 0.17517  |
| PA | C3C  | -0.34561 | -0.33436 | -0.33931 | -0.34217 |
| PA | C4C  | 0.51973  | 0.44938  | 0.51464  | 0.52517  |
| PA | CMC  | -0.45089 | -0.45701 | -0.45995 | -0.4605  |
| PA | HMC1 | 0.14263  | 0.14522  | 0.14461  | 0.14545  |
| PA | HMC2 | 0.10587  | 0.1154   | 0.10633  | 0.10423  |
| PA | HMC3 | 0.169    | 0.15458  | 0.17435  | 0.17575  |
| PA | CAC  | 0.24437  | 0.23334  | 0.25564  | 0.25314  |
| PA | HAC1 | -0.01406 | -0.01265 | -0.01913 | -0.01278 |
| PA | HAC2 | -0.01168 | -0.00766 | -0.0139  | -0.01328 |
| PA | CBC  | -0.36854 | -0.36076 | -0.36448 | -0.36506 |
| PA | HBC1 | 0.07625  | 0.09128  | 0.07344  | 0.07523  |
| PA | HBC2 | 0.12013  | 0.09959  | 0.11749  | 0.12495  |
| PA | HBC3 | 0.1198   | 0.10635  | 0.11876  | 0.11569  |
| PA | ND   | -0.59023 | -0.54381 | -0.61055 | -0.62445 |
| PA | C1D  | 0.32799  | 0.29357  | 0.33115  | 0.3568   |
| PA | C2D  | 0.10191  | 0.13746  | 0.09745  | 0.08186  |
| PA | C3D  | -0.24546 | -0.23374 | -0.24522 | -0.23111 |
| PA | C4D  | 0.10174  | 0.12146  | 0.14848  | 0.15287  |
| PA | CMD  | -0.39356 | -0.37333 | -0.38527 | -0.38357 |
| PA | HMD1 | 0.12076  | 0.10804  | 0.12127  | 0.12866  |

|    |      |          |          |          |          |
|----|------|----------|----------|----------|----------|
| PA | HMD2 | 0.12681  | 0.12909  | 0.12559  | 0.13332  |
| PA | HMD3 | 0.16336  | 0.14208  | 0.1589   | 0.166    |
| PA | CAD  | 0.67182  | 0.60958  | 0.62913  | 0.62172  |
| PA | OBD  | -0.55813 | -0.45223 | -0.49857 | -0.48735 |
| PA | CBD  | -0.67514 | -0.53692 | -0.60269 | -0.60365 |
| PA | HBD1 | 0.17901  | 0.16681  | 0.16848  | 0.16796  |
| PA | C1   | -0.13009 | -0.14639 | -0.12111 | -0.12183 |
| PA | H1   | 0.1022   | 0.11775  | 0.0979   | 0.09838  |
| PA | H2   | 0.1061   | 0.11882  | 0.10115  | 0.0992   |
| PA | H3   | 0.12244  | 0.1001   | 0.12652  | 0.12703  |
| PA | HBD  | 0.18688  | 0.17082  | 0.16824  | 0.16923  |
|    |      |          |          |          |          |
| PB | MG   | 1.35853  | 1.1124   | 1.3527   | 1.34815  |
| PB | CHA  | 0.12088  | 0.15292  | 0.12378  | 0.12901  |
| PB | CHB  | -0.51362 | -0.46069 | -0.51867 | -0.51729 |
| PB | HHB  | 0.19218  | 0.17763  | 0.19173  | 0.18954  |
| PB | CHC  | -0.38849 | -0.30548 | -0.39635 | -0.39395 |
| PB | HHC  | 0.13241  | 0.12449  | 0.13872  | 0.13877  |
| PB | CHD  | -0.55837 | -0.45312 | -0.54531 | -0.54271 |
| PB | HHD  | 0.23664  | 0.20053  | 0.23309  | 0.23365  |
| PB | NA   | -0.34272 | -0.26886 | -0.34793 | -0.33942 |
| PB | C1A  | -0.22831 | -0.3021  | -0.22575 | -0.23823 |
| PB | C2A  | 0.49422  | 0.59141  | 0.47633  | 0.47915  |
| PB | H2A  | -0.05042 | -0.05308 | -0.04769 | -0.05049 |
| PB | C3A  | 0.0312   | -0.04915 | 0.03789  | 0.04273  |
| PB | H3A  | 0.0621   | 0.07952  | 0.05959  | 0.0559   |
| PB | C4A  | 0.35467  | 0.27678  | 0.35818  | 0.34828  |
| PB | CMA  | -0.42608 | -0.39122 | -0.42757 | -0.42734 |
| PB | HMA1 | 0.10514  | 0.11433  | 0.10461  | 0.10067  |
| PB | HMA2 | 0.12126  | 0.10104  | 0.1222   | 0.12249  |
| PB | HMA3 | 0.1146   | 0.11957  | 0.1133   | 0.11221  |
| PB | CAA  | -0.00393 | -0.14371 | 0.00283  | 0.01069  |
| PB | HAA1 | 0.00884  | 0.05364  | 0.01005  | 0.01     |
| PB | HAA2 | 0.02461  | 0.05333  | 0.02449  | 0.02263  |
| PB | CBA  | -0.63271 | -0.56224 | -0.63414 | -0.6418  |
| PB | HBA1 | 0.18245  | 0.17408  | 0.18232  | 0.18114  |

|    |      |          |          |          |          |
|----|------|----------|----------|----------|----------|
| PB | HBA2 | 0.13977  | 0.11763  | 0.14035  | 0.14156  |
| PB | CGA  | 0.84333  | 0.80129  | 0.84197  | 0.84489  |
| PB | O1A  | -0.58279 | -0.51554 | -0.58321 | -0.58592 |
| PB | O2A  | -0.3051  | -0.31936 | -0.30537 | -0.30429 |
| PB | NB   | -0.66754 | -0.59562 | -0.65138 | -0.64783 |
| PB | C1B  | 0.32077  | 0.2612   | 0.31015  | 0.30493  |
| PB | C2B  | 0.15838  | 0.16831  | 0.16662  | 0.16699  |
| PB | C3B  | -0.23867 | -0.19093 | -0.2533  | -0.25591 |
| PB | C4B  | 0.41627  | 0.35637  | 0.4071   | 0.40484  |
| PB | CMB  | -0.29649 | -0.35888 | -0.2915  | -0.28883 |
| PB | HMB1 | 0.07598  | 0.09525  | 0.07464  | 0.07222  |
| PB | HMB2 | 0.09513  | 0.11486  | 0.09212  | 0.08915  |
| PB | HMB3 | 0.07184  | 0.12427  | 0.06763  | 0.06742  |
| PB | CAB  | 0.02834  | 0.00814  | 0.04768  | 0.05133  |
| PB | HAB  | 0.11453  | 0.12387  | 0.10714  | 0.10782  |
| PB | CBB  | -0.42622 | -0.41991 | -0.43483 | -0.43622 |
| PB | HBB1 | 0.15344  | 0.16763  | 0.1533   | 0.15405  |
| PB | HBB2 | 0.19801  | 0.19906  | 0.19553  | 0.19404  |
| PB | NC   | -0.70413 | -0.60781 | -0.70046 | -0.7013  |
| PB | C1C  | 0.29532  | 0.22179  | 0.29988  | 0.30206  |
| PB | C2C  | 0.22291  | 0.22709  | 0.22506  | 0.22159  |
| PB | C3C  | -0.3708  | -0.33852 | -0.37414 | -0.37329 |
| PB | C4C  | 0.54001  | 0.44021  | 0.52765  | 0.52706  |
| PB | CMC  | -0.42425 | -0.41528 | -0.45084 | -0.44988 |
| PB | HMC1 | 0.11128  | 0.11881  | 0.11703  | 0.11648  |
| PB | HMC2 | 0.10893  | 0.11861  | 0.11355  | 0.11597  |
| PB | HMC3 | 0.16306  | 0.14423  | 0.17552  | 0.17894  |
| PB | CAC  | 0.32611  | 0.2814   | 0.33112  | 0.33209  |
| PB | HAC1 | -0.00848 | -0.0247  | -0.00957 | -0.01091 |
| PB | HAC2 | -0.0372  | -0.0203  | -0.04411 | -0.04109 |
| PB | CBC  | -0.39318 | -0.37069 | -0.38244 | -0.3815  |
| PB | HBC1 | 0.07918  | 0.08871  | 0.07589  | 0.07264  |
| PB | HBC2 | 0.15605  | 0.10198  | 0.15276  | 0.15411  |
| PB | HBC3 | 0.10035  | 0.10817  | 0.0978   | 0.09893  |
| PB | ND   | -0.71257 | -0.58977 | -0.70449 | -0.69842 |
| PB | C1D  | 0.46548  | 0.34271  | 0.45406  | 0.44911  |

|                         |      |          |          |          |          |
|-------------------------|------|----------|----------|----------|----------|
| PB                      | C2D  | 0.03655  | 0.1055   | 0.03538  | 0.03615  |
| PB                      | C3D  | -0.19747 | -0.22355 | -0.19595 | -0.19692 |
| PB                      | C4D  | 0.22944  | 0.17668  | 0.21979  | 0.21074  |
| PB                      | CMD  | -0.36285 | -0.37084 | -0.35912 | -0.36105 |
| PB                      | HMD1 | 0.1329   | 0.11369  | 0.1303   | 0.13047  |
| PB                      | HMD2 | 0.1293   | 0.12607  | 0.12803  | 0.12939  |
| PB                      | HMD3 | 0.1747   | 0.14627  | 0.17339  | 0.17233  |
| PB                      | CAD  | 0.60794  | 0.61788  | 0.60586  | 0.60764  |
| PB                      | OBD  | -0.44229 | -0.45118 | -0.44384 | -0.44976 |
| PB                      | CBD  | -0.57808 | -0.53638 | -0.57341 | -0.57379 |
| PB                      | HBD1 | 0.17478  | 0.16779  | 0.17212  | 0.16916  |
| PB                      | C1   | -0.13388 | -0.13296 | -0.13236 | -0.13196 |
| PB                      | H1   | 0.1388   | 0.11722  | 0.13891  | 0.13722  |
| PB                      | H2   | 0.09599  | 0.11145  | 0.09527  | 0.09322  |
| PB                      | H3   | 0.09113  | 0.09974  | 0.09033  | 0.09072  |
| PB                      | HBD  | 0.16942  | 0.17122  | 0.16752  | 0.16464  |
| <hr/> <b>total (PA)</b> |      | 0.32152  | 0.45507  | 0.37043  | 0.40521  |
| <hr/> <b>total (PB)</b> |      | 0.67851  | 0.5449   | 0.62953  | 0.59481  |
| <hr/>                   |      |          |          |          |          |
